# Supplementary material for: Spectroscopic analysis of the coupled 11Π, 23Σ+ (Ω = 0−, 1), and b3Π (Ω = 0±, 1, 2) states of the KRb molecule using both ultracold molecules and molecular beam experiments
Source: Royal Society of Chemistry journal article supplement (doi:10.1039/c1cp21207a), 2011-01-01
Supplement: c1cp21207a.pdf [file c1cp21207a.pdf]

**Electronic Supplementary Information**

$T_{v'}$  values of the  $1^1\Pi$  state reported by Kasahara *et al.* for the overlapped energy region. We add the dissociation energy of the  $X^1\Sigma^+$  state,  $4217.822 \pm 0.03 \text{ cm}^{-1}$ , to the corresponding values reported from Physical Review A, 2007, **75**, 032511 in order to convert them to the  $T_{v'}$  values. The discrepancies between our data and those of Kasahara *et al.* may come from the experimental resolution ( $\sim 0.12 \text{ cm}^{-1}$ ), wavelength calibration errors ( $\sim 0.2 \text{ cm}^{-1}$ ) in the MB experiment and probe laser linewidth ( $0.2 \text{ cm}^{-1}$ ) and the fitted uncertainty for the line positions is  $0.3 \text{ cm}^{-1}$  due to laser scan nonlinearity in the UM experiment.

(a) The  $1^1\Pi$  state

| Vib.<br>Num. | Our work                       |                                | Kasahara <i>et al.</i> <sup>13</sup> | Okada <i>et al.</i> <sup>12</sup> |
|--------------|--------------------------------|--------------------------------|--------------------------------------|-----------------------------------|
|              | $T_{v'}(\text{cm}^{-1})$<br>MB | $T_{v'}(\text{cm}^{-1})$<br>UM | $T_{v'}(\text{cm}^{-1})$             | $T_{v'}(\text{cm}^{-1})$          |
| $v' = 0$     | 15043.05                       |                                |                                      | 15043.019                         |
| 1            | 15103.93                       |                                |                                      | 15103.964                         |
| 2            | 15164.63                       |                                |                                      | 15164.427                         |
| 3            | 15223.93                       |                                |                                      | 15224.303                         |
| 4            | 15283.66                       |                                |                                      | 15283.691                         |
| 5            | 15342.57                       |                                |                                      | 15342.496                         |
| 6            | 15402.15                       |                                |                                      | 15400.747                         |
| 7            | 15460.01                       | 15459.55                       |                                      | 15458.068                         |
| 8            | 15512.29                       | 15511.90                       |                                      | 15514.803                         |
| 9            | 15567.96                       |                                |                                      | 15569.756                         |
| 10           | 15623.65                       | 15623.59                       |                                      | 15622.943                         |
| 11           | 15677.20                       | 15677.25                       |                                      | 15675.841                         |
| 12           | 15730.09                       | 15730.13                       | 15727.307                            | 15725.984                         |
| 13           | 15771.98                       | 15771.96                       | 15773.297                            |                                   |
| 14           | 15814.71                       | 15814.73                       | 15814.409                            |                                   |
| 15           |                                | 15848.63                       | 15849.356                            |                                   |
| 16           |                                | 15880.09                       | 15880.849                            |                                   |
| 17           |                                | 15909.93                       | 15910.403                            |                                   |
| 18           |                                | 15938.65                       | 15939.072                            |                                   |
| 19           |                                | 15964.68                       | 15966.599                            |                                   |
| 20           |                                | 15993.45                       | 15993.568                            |                                   |
|              |                                |                                |                                      |                                   |

(b) The  $2^3\Sigma^+$  state

| Vib. Num. | Our work                                   |                                               |                                               | Okada <i>et al.</i> <sup>12</sup> |
|-----------|--------------------------------------------|-----------------------------------------------|-----------------------------------------------|-----------------------------------|
|           | $T_v(\text{cm}^{-1})$<br>MB ( $\Omega=1$ ) | $T_v(\text{cm}^{-1})$<br>UM<br>( $\Omega=1$ ) | $T_v(\text{cm}^{-1})$<br>UM<br>( $\Omega=0$ ) | $T_v(\text{cm}^{-1})$ :           |
| $v_a$     | 15116.18                                   |                                               |                                               |                                   |
| $v_a+1$   | 15154.19                                   |                                               |                                               |                                   |
| $v_a+2$   | 15190.37                                   |                                               |                                               |                                   |
| $v_a+3$   | 15226.49                                   |                                               |                                               |                                   |
| $v_a+4$   | 15256.46                                   |                                               |                                               |                                   |
| $v_a+5$   | 15291.52                                   |                                               |                                               | 15291.65                          |
| $v_a+6$   | 15324.97                                   |                                               |                                               |                                   |
| $v_a+7$   | 15359.08                                   | 15358.60                                      | 15359.44                                      | 15358.64                          |
| $v_a+8$   | 15390.24                                   | 15389.68                                      | 15390.65                                      |                                   |
| $v_a+9$   | 15423.23                                   | 15422.73                                      | 15424.81                                      |                                   |
| $v_a+10$  | 15453.41                                   | 15452.99                                      | 15457.43                                      |                                   |
| $v_a+11$  | 15486.57                                   | 15486.24                                      | 15488.88                                      |                                   |
| $v_a+12$  | 15520.40                                   | 15520.21                                      | 15520.96                                      | 15517.65                          |
| $v_a+13$  | 15548.40                                   | 15548.84                                      | 15550.06                                      |                                   |
| $v_a+14$  | 15581.57                                   | 15581.33                                      | 15582.15                                      |                                   |
| $v_a+15$  |                                            | 15612.46                                      | 15615.35                                      |                                   |
| $v_a+16$  | 15640.49                                   | 15640.27                                      | 15637.85                                      | 15640.88                          |
| $v_a+17$  |                                            | 15669.26                                      | 15668.10                                      |                                   |
| $v_a+18$  | 15695.89                                   | 15695.92                                      |                                               |                                   |
| $v_a+19$  | 15722.32                                   | 15722.30                                      |                                               |                                   |
| $v_a+20$  | 15755.35                                   | 15755.18                                      | 15753.47                                      |                                   |
| $v_a+21$  | 15785.79                                   | 15785.71                                      | 15782.62                                      |                                   |
| $v_a+22$  | 15814.41                                   | 15814.73                                      |                                               |                                   |
| $v_a+23$  |                                            | 15837.28                                      | 15835.54                                      |                                   |
| $v_a+24$  |                                            | 15860.91                                      |                                               |                                   |
| $v_a+25$  |                                            | 15890.66                                      | 15888.85                                      |                                   |
| $v_a+26$  |                                            | 15916.30                                      | 15914.60                                      |                                   |
| $v_a+27$  |                                            | 15942.73                                      | 15941.12                                      |                                   |
| $v_a+28$  |                                            | 15964.68                                      |                                               |                                   |
| $v_a+29$  |                                            | 15990.88                                      | 15990.85                                      |                                   |
| $v_a+30$  |                                            | 16016.16                                      |                                               |                                   |
| $v_a+31$  |                                            | 16037.76                                      |                                               |                                   |
| $v_a+32$  |                                            | 16062.86                                      |                                               |                                   |
| $v_a+33$  |                                            | 16087.40                                      | 16086.69                                      |                                   |

\*Vibrational number assignments were made by comparing the energies from theoretical calculations<sup>15</sup> with the experimental ones. Here we estimate  $v_a=34$ . Above 15850  $\text{cm}^{-1}$  there are no MB spectra so that we do not know the  $\Omega$  assignments; We assume here that the  $\Omega=1$  level remains above the  $\Omega=0$  level since this is the case in the region 15637- 15837  $\text{cm}^{-1}$ .

(c) The  $b^3\Pi$  state

| Vib.<br>Num. | Our work                                      |                                               |                                               |                                                   | Okada <i>et al.</i> <sup>12</sup>       |
|--------------|-----------------------------------------------|-----------------------------------------------|-----------------------------------------------|---------------------------------------------------|-----------------------------------------|
|              | $T_v(\text{cm}^{-1})$<br>MB<br>( $\Omega=1$ ) | $T_v(\text{cm}^{-1})$<br>UM<br>( $\Omega=2$ ) | $T_v(\text{cm}^{-1})$<br>UM<br>( $\Omega=1$ ) | $T_v(\text{cm}^{-1})$<br>UM<br>( $\Omega=0^\pm$ ) | $T_v(\text{cm}^{-1})$<br>( $\Omega=1$ ) |
| $v_a$        | 15355.10                                      |                                               |                                               |                                                   | 15357.25                                |
| $v_a + 1$    | 15402.12                                      |                                               |                                               |                                                   | 15401.41                                |
| $v_a + 2$    | 15445.06                                      |                                               |                                               |                                                   |                                         |
| $v_a + 3$    | ~15492                                        | ~15493                                        | 15490.45                                      |                                                   |                                         |
| $v_a + 4$    | ~15532                                        | ~15535                                        | 15531.70                                      | 15526.69                                          |                                         |
| $v_a + 5$    | ~15573                                        | ~15577                                        | 15574.61                                      | 15569.96                                          |                                         |
| $v_a + 6$    |                                               |                                               | 15617.25                                      | 15612.46                                          |                                         |
| $v_a + 7$    | ~15658                                        |                                               | 15657.67                                      | 15651.62                                          |                                         |
| $v_a + 8$    | ~15701                                        |                                               | 15700.36                                      | 15695.92                                          |                                         |
| $v_a + 9$    | ~15739                                        | 15744.21                                      | 15739.9                                       | 15734.32                                          |                                         |
| $v_a + 10$   | ~15778                                        | 15782.62                                      | 15778.41                                      | 15775.05                                          |                                         |
| $v_a + 11$   |                                               |                                               | 15819.95                                      | 15814.73                                          |                                         |
| $v_a + 12$   |                                               | 15860.91                                      | 15856.61                                      | 15852.94                                          |                                         |
| $v_a + 13$   |                                               | 15897.41                                      | 15893.13                                      | 15888.85                                          |                                         |
| $v_a + 14$   |                                               |                                               | 15932.91                                      |                                                   |                                         |
| $v_a + 15$   |                                               |                                               | 15971.99                                      | 15966.69                                          |                                         |
| $v_a + 16$   |                                               |                                               | 16005.80                                      |                                                   |                                         |
| $v_a + 17$   |                                               |                                               | 16041.89                                      | 16037.76                                          |                                         |
| $v_a + 18$   |                                               |                                               | 16076.05                                      |                                                   |                                         |
| $v_a + 19$   |                                               |                                               | 16107.34                                      |                                                   |                                         |

\*Vibrational number assignments are made by comparing the energies from theoretical calculation<sup>15</sup> with the experimental ones. According to the theoretical calculation,  $\Omega=2$  for same vibrational quantum number has the highest energy and  $\Omega=1$  is between the  $\Omega=2$  and the  $\Omega=0$ . Here we estimate  $v_a=87$ .
